# Supplementary material for: Preparation of a Ni–Fe-based transition metal phosphide as an efficient electrocatalyst for the oxygen evolution reaction
Source: Royal Society of Chemistry journal article supplement (doi:10.1039/d2se01042a), 2022-01-01
Supplement: d2se01042a1.pdf [file d2se01042a1.pdf]

## Supporting information

### Preparation of Ni-Fe-based transition metal phosphide as efficient electrocatalyst for the oxygen evolution reaction

Huanhuan Tang,<sup>‡a</sup> Yufan Qi,<sup>‡a</sup> Danning Feng,<sup>a</sup> Yangyang Chen,<sup>a</sup> Liying Liu,<sup>a</sup> Lei Hao,<sup>a</sup> Kefen Yue,<sup>\*a</sup> Dongshen Li,<sup>\*b</sup> and Yaoyu Wang<sup>a</sup>

<sup>a</sup> College of Chemistry and Materials Science, Key Laboratory of Synthetic and Natural Functional Molecule of the Ministry of Education, National Demonstration Center for Experimental Chemistry Education, Shaanxi Key Laboratory of Physico-Inorganic Chemistry, Northwest University, Xi'an 710127, People's Republic of China.

Email: ykflyy@nwu.edu.cn

<sup>b</sup> Dong-Sheng Li

College of Materials and Chemical Engineering, Hubei Provincial Collaborative Innovation Center for New Energy Microgrid, Key Laboratory of Inorganic Nonmetallic Crystalline and Energy Conversion Materials, China Three Gorges University, No. 8, Daxue Road, Yichang, 443002, China.

Email: lidongsheng1@126.com

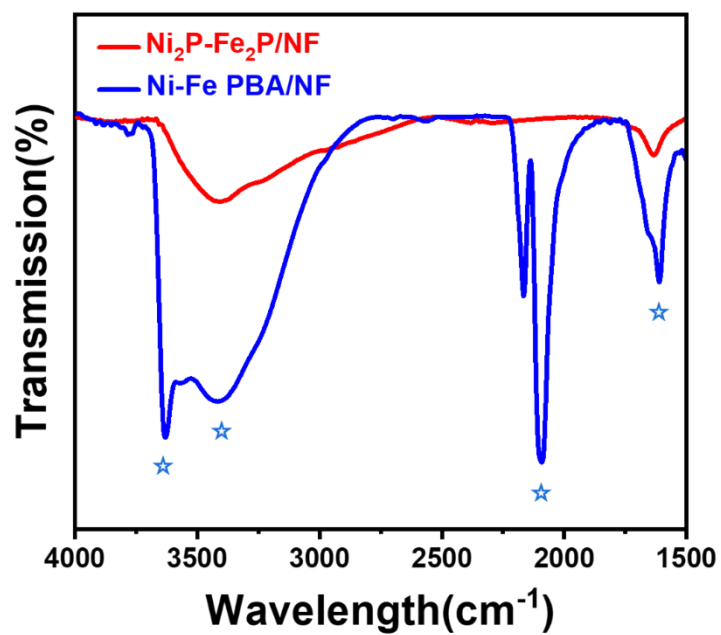

Fig. S1 FT-IR spectra of Ni<sub>2</sub>P-Fe<sub>2</sub>P/NF and Ni-Fe PBA/NF.

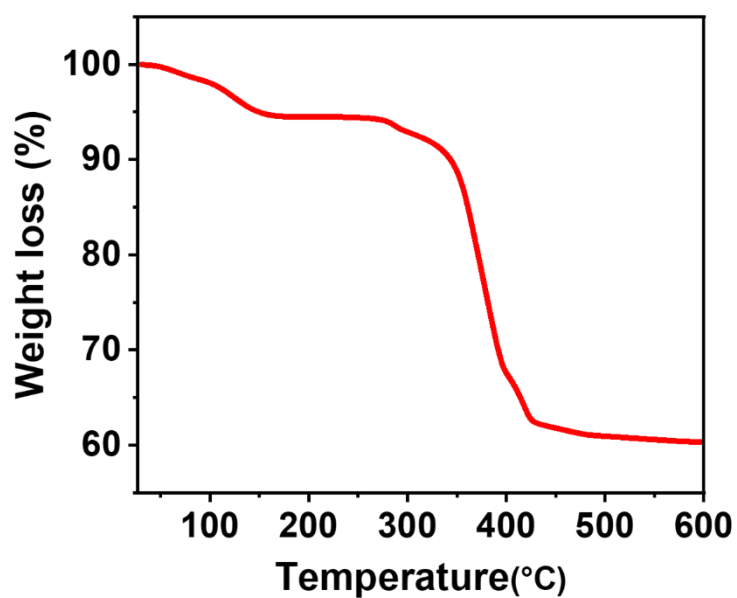

Fig. S2 TGA curve of Ni-Fe PBA precursor measured under a N<sub>2</sub> atmosphere.

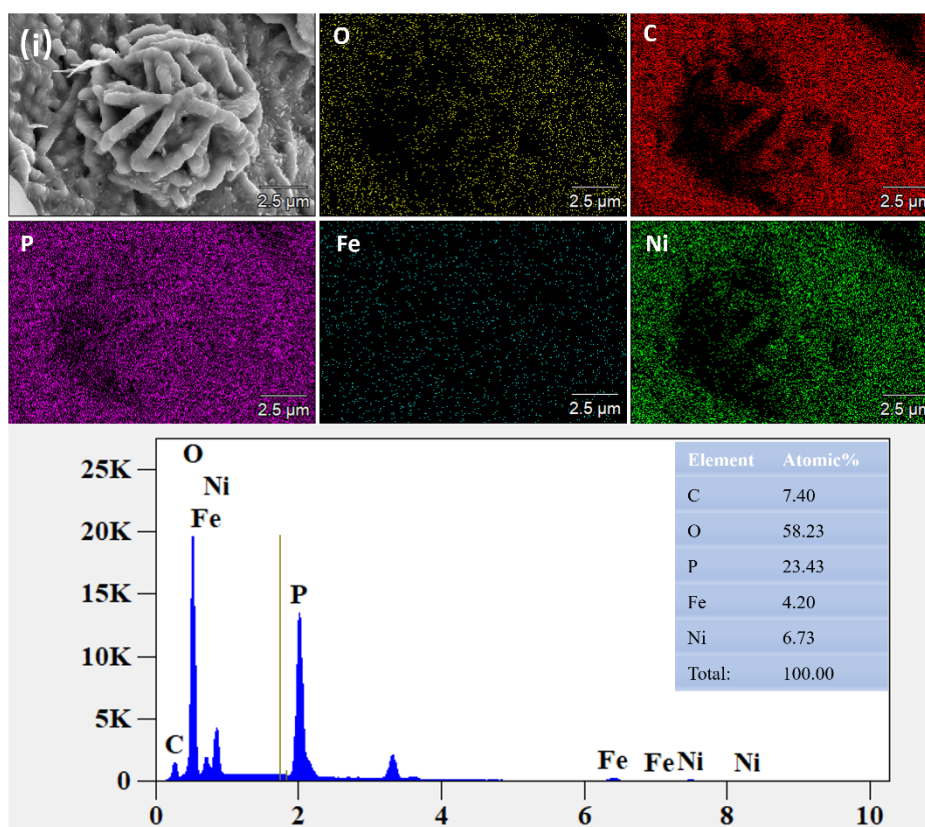

Fig. S3 EDX spectrum and corresponding elemental compositions of the  $\text{Ni}_2\text{P-Fe}_2\text{P/NF}$ .

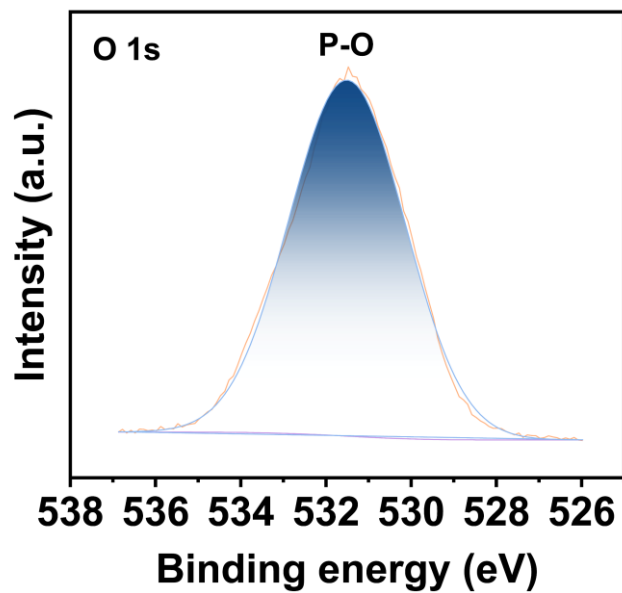

Fig. S4 High-resolution XPS spectrum of O 1s.

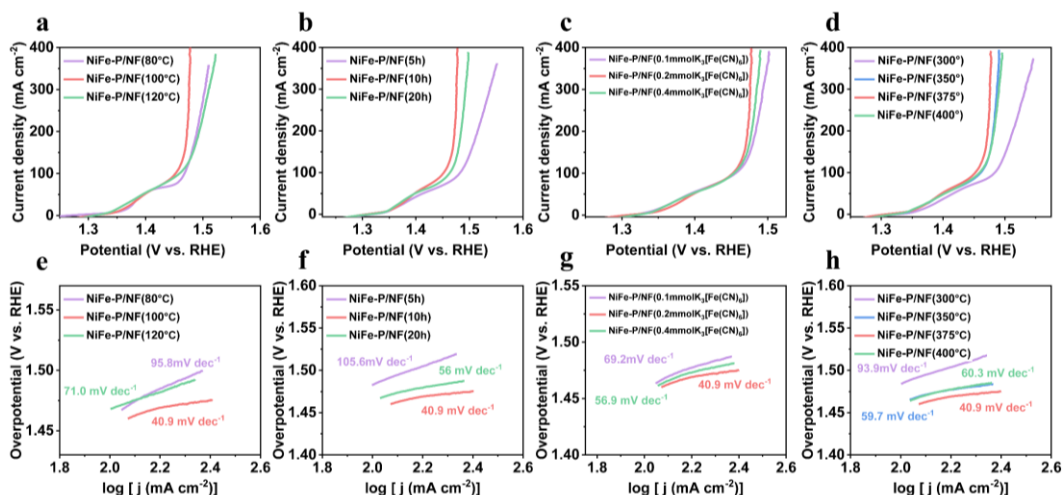

**Fig. S5** Under different conditions, the LSV curves and Tafel slopes of mixed-metal phosphides.

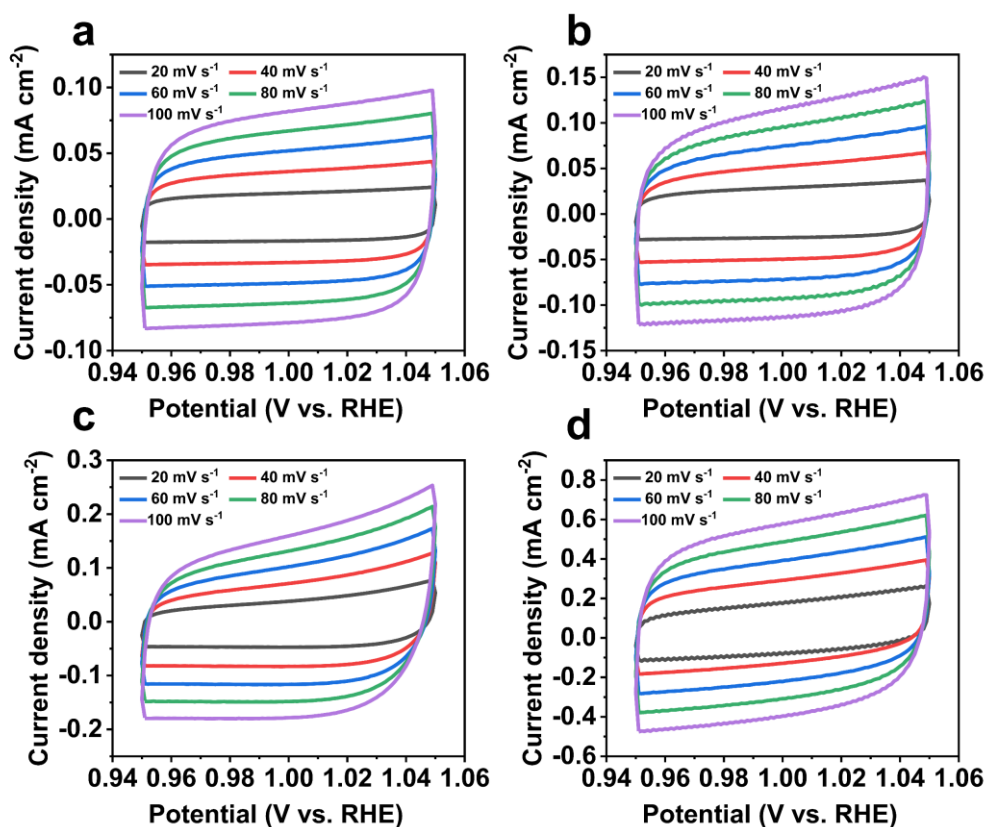

**Fig. S6** The cyclic voltammograms (CVs) measurements with various scan rates for (a) NF, (b) Ni(OH)<sub>2</sub>/NF, (c) Ni-Fe PBA/NF, (d) Ni<sub>2</sub>P-Fe<sub>2</sub>P/NF.

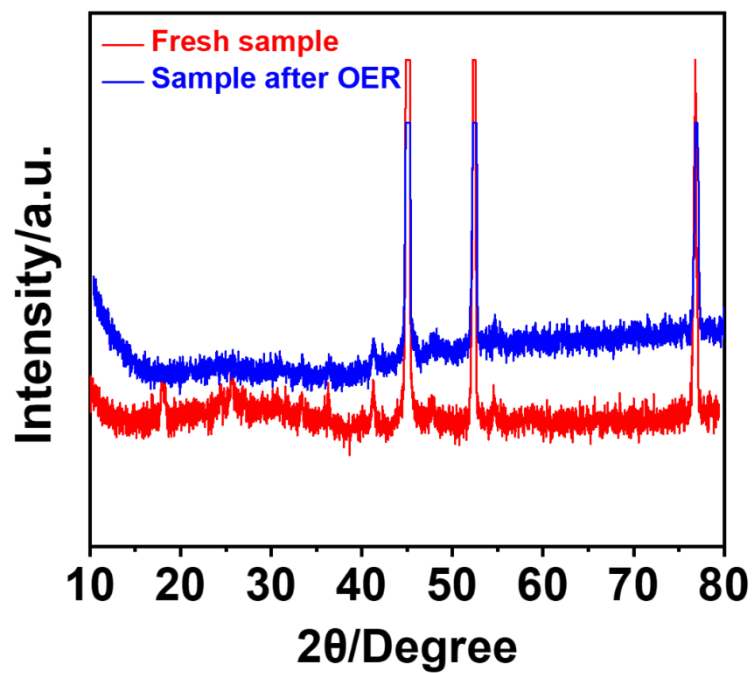

Fig. S7 The XRD patterns of fresh sample and sample after OER.

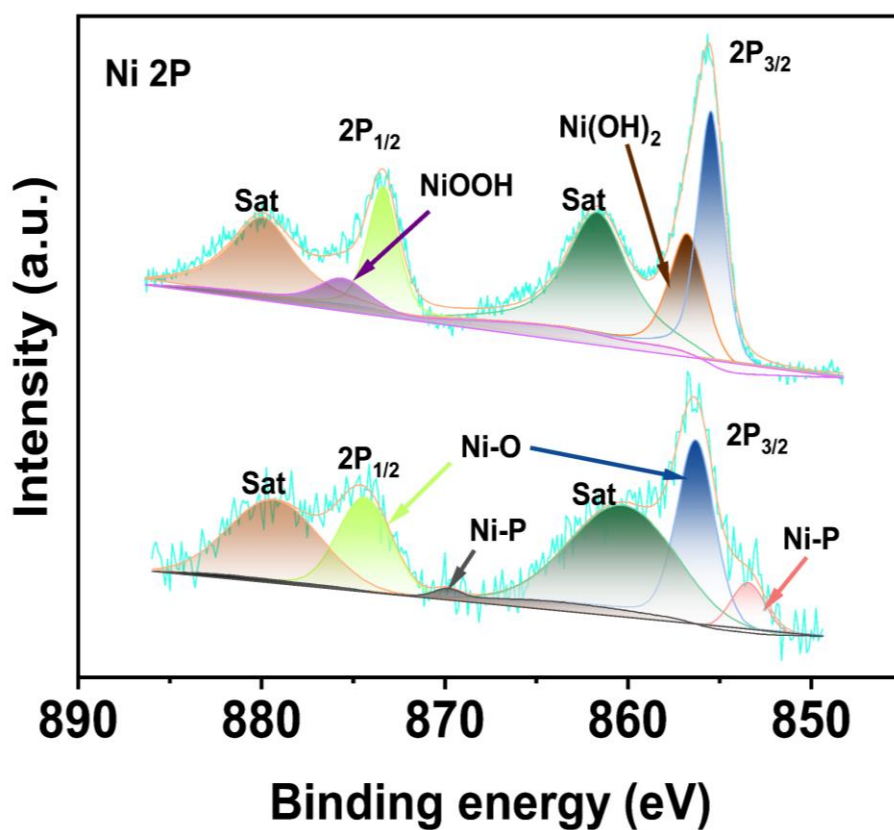

Fig. S8 The high resolution XPS of Ni 2p before (down) and after (up) OER test.

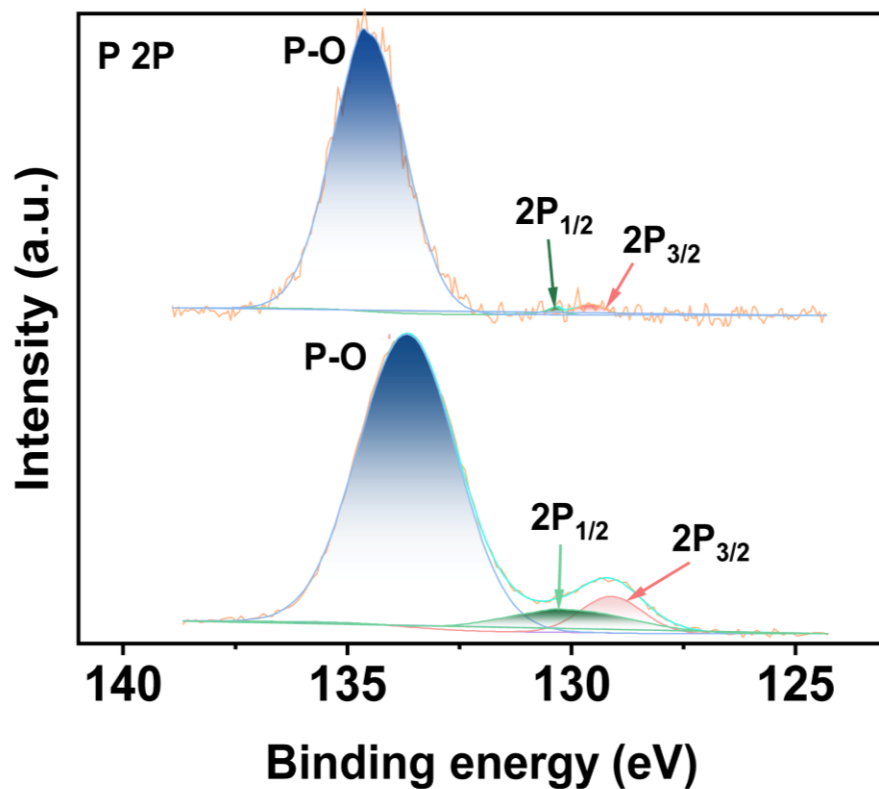

Fig. S9 The high resolution XPS of P 2p before (down) and after (up) OER test.

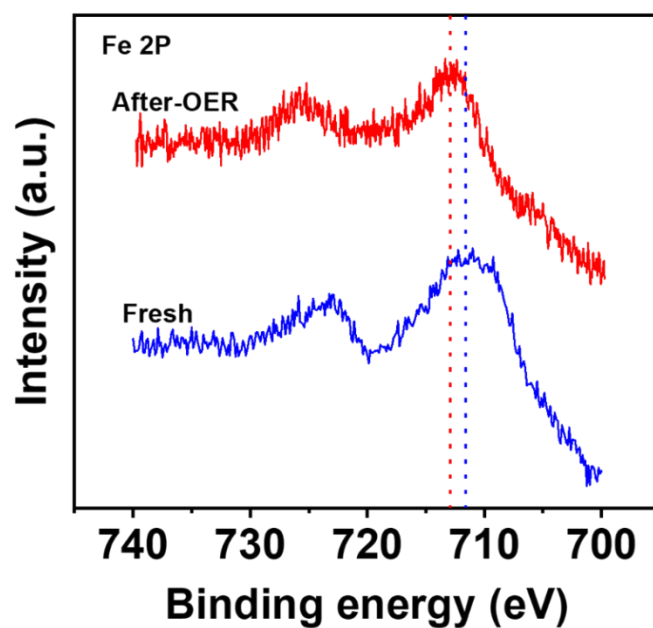

Fig. S10 The high resolution XPS of Fe 2p before (down) and after (up) OER test.

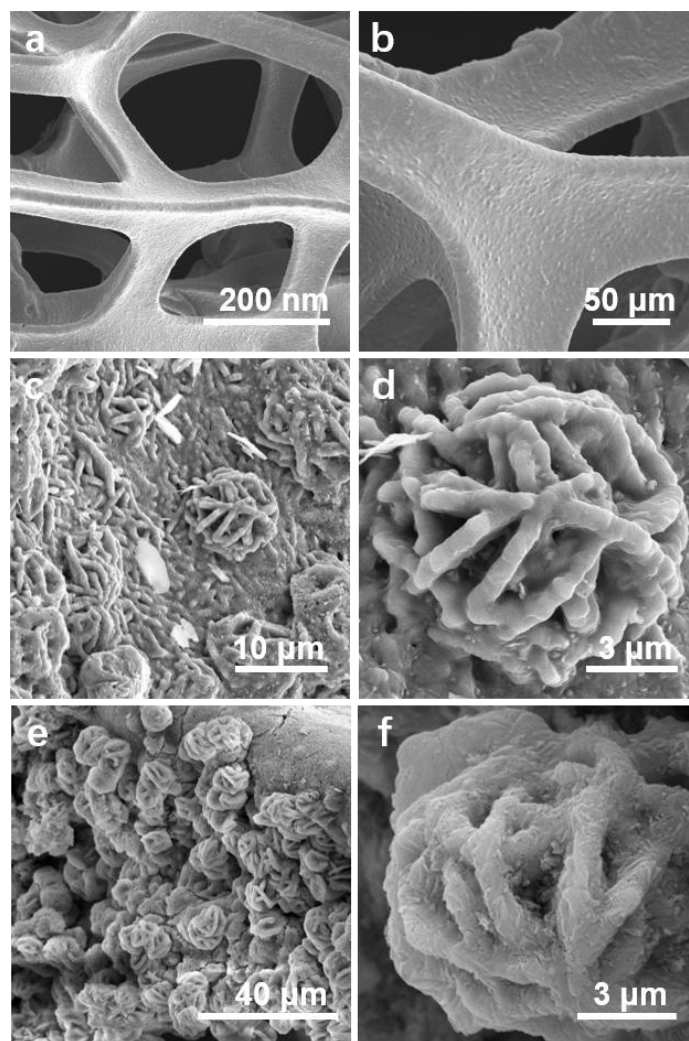

**Fig. S11** The SEM images of (a,b)bare NF, (c,d) Ni<sub>2</sub>P-Fe<sub>2</sub>P/NF and (e,f) Ni<sub>2</sub>P-Fe<sub>2</sub>P/NF after OER test.

**Table S1** Average mass loading of catalysts on NF substrates.

| Samples                                | Mass loading (mg cm <sup>-2</sup> ) |
|----------------------------------------|-------------------------------------|
| Ni(OH) <sub>2</sub> /NF                | 3.19                                |
| Ni-Fe PBA/NF                           | 2.02                                |
| Ni <sub>2</sub> P-Fe <sub>2</sub> P/NF | 2.63                                |

**Table S2** The simulated series resistance ( $R_s$ ) and charge transfer resistance ( $R_{ct}$ ) values based on the fitting models.

| Samples                                | $R_s$ ( $\Omega$ ) | $R_{ct}$ ( $\Omega$ ) |
|----------------------------------------|--------------------|-----------------------|
| NF                                     | 1.258              | 5.68                  |
| Ni(OH) <sub>2</sub> /NF                | 1.276              | 5.50                  |
| Ni-Fe PBA/NF                           | 1.497              | 1.18                  |
| Ni <sub>2</sub> P-Fe <sub>2</sub> P/NF | 1.288              | 0.23                  |

**Table S3** The activity comparison of PBA precursors on the surface of NF for OER in 1.0 M KOH solution.

| Catalysis                                                | Electrolyte | Overpotential                     | Tafel slope                | Ref       |
|----------------------------------------------------------|-------------|-----------------------------------|----------------------------|-----------|
| <b>Ni<sub>2</sub>P-Fe<sub>2</sub>P/NF</b>                | 1 M KOH     | 222 mV<br>100 mA cm <sup>-2</sup> | 40.9 mV dec <sup>-1</sup>  | This work |
| <b>NiFeP@NiP@NF</b>                                      | 1 M KOH     | 252 mV<br>100 mA cm <sup>-2</sup> | 56 mV dec <sup>-1</sup>    | 1         |
| <b>NiFe<sub>2</sub>O<sub>4</sub>@NPNiFePB<br/>A/NF</b>   | 1 M KOH     | 304 mV<br>100 mA cm <sup>-2</sup> | 80 mV dec <sup>-1</sup>    | 2         |
| <b>Ni(OH)<sub>2</sub>@Ni<sub>3</sub>S<sub>2</sub>/NF</b> | 1 M KOH     | 210 mV<br>100 mA cm <sup>-2</sup> | 62.0 mV dec <sup>-1</sup>  | 3         |
| <b>NiSe<sub>2</sub>/CoSe/NF</b>                          | 1 M KOH     | 270 mV<br>100 mA cm <sup>-2</sup> | 69.77 mV dec <sup>-1</sup> | 4         |
| <b>Ni-Fe-P@NC/NF</b>                                     | 1 M KOH     | 245 mV<br>100 mA cm <sup>-2</sup> | 81.0 mV dec <sup>-1</sup>  | 5         |
| <b>(Mo, Fe)P<sub>2</sub>O<sub>7</sub>@NF</b>             | 1 M KOH     | 250 mV<br>100 mA cm <sup>-2</sup> | 40.0 mV dec <sup>-1</sup>  | 6         |
| <b>NiFeP<sub>x</sub>/NF</b>                              | 1 M KOH     | 258 mV<br>100 mA cm <sup>-2</sup> | 29 mV dec <sup>-1</sup>    | 7         |
| <b>FeCoNi-LDH/NF</b>                                     | 1.0 M KOH   | 230 mV                            | 45.76 mV dec <sup>-1</sup> | 8         |



|                                                       |                 |                                  |                           |    |
|-------------------------------------------------------|-----------------|----------------------------------|---------------------------|----|
|                                                       | + 0.5 M<br>urea | 100 mA cm <sup>-2</sup>          |                           |    |
| <b>FeCoNiN/NF</b>                                     | 1 M KOH         | 267 mV<br>50 mA cm <sup>-2</sup> | 60mV dec <sup>-1</sup>    | 9  |
| <b>Ni<sub>3</sub>S<sub>2</sub>@MIL-53(NiFeCo)/NF</b>  | 1 M KOH         | 236 mV<br>50 mA cm <sup>-2</sup> | 14.8 mV dec <sup>-1</sup> | 10 |
| <b>MOF CoFeP</b>                                      | 1 M KOH         | 140 mV<br>50 mA cm <sup>-2</sup> | 40 mV dec <sup>-1</sup>   | 11 |
| <b>NiFeP@NC/NF</b>                                    | 1 M KOH         | 286 mV<br>20 mA cm <sup>-2</sup> | 69 mV dec <sup>-1</sup>   | 12 |
| <b>Ru–MnFeP/NF</b>                                    | 1 M KOH         | 191 mV<br>20 mA cm <sup>-2</sup> | 69 mV dec <sup>-1</sup>   | 13 |
| <b>PBA-SMo /NF-10 h</b>                               | 1 M KOH         | 252 mV<br>20 mA cm <sup>-2</sup> | 64 mV dec <sup>-1</sup>   | 14 |
| <b>CuFe-P/NF</b>                                      | 1 M KOH         | 231 mV<br>10 mA cm <sup>-2</sup> | 63.0 mV dec <sup>-1</sup> | 15 |
| <b>Fe-CoP/NF</b>                                      | 1 M KOH         | 190 mV<br>10 mA cm <sup>-2</sup> | 92 mV dec <sup>-1</sup>   | 16 |
| <b>Ni<sub>x</sub>Co<sub>3-x</sub>O<sub>4</sub>/NF</b> | 1 M KOH         | 287 mV<br>10 mA cm <sup>-2</sup> | 88 mV dec <sup>-1</sup>   | 17 |
| <b>CoFePBA@NiCoFe-LTH/NF</b>                          | 1 M KOH         | 228 mV<br>10 mA cm <sup>-2</sup> | 36 mV dec <sup>-1</sup>   | 18 |
| <b>(NiCo)<sub>2</sub>P/NF</b>                         | 1 M KOH         | 162 mV<br>10 mA cm <sup>-2</sup> | 135 mV dec <sup>-1</sup>  | 19 |

## References

- 1 F. Diao, W. Huang, G. Ctistis, H. Wackerbarth, Y. Yang, P. Si, J. Zhang, X. Xiao and C. Engelbrekt, *ACS Appl Mater Interfaces*, 2021, **13**, 23702-23713.
- 2 X. Zhang, I. U. Khan, S. Huo, Y. Zhao, B. Liang, K. Li and H. Wang, *Electrochimica Acta*, 2020, **363**, 137221.

- 3 X. Chen, L. Yang, Y. Huang, S. Ge, H. Zhang, Y. Cui, A. Huang and Z. Xiao, *Chem. Eur. J*, 2020, **26**, 1111-1116.
- 4 J. Zhang, L. Jin, P. Gu, L. Hu, D. Chen, J. He, Q. Xu and J. Lu, *ACS Appl. Nano Mater*, 2021, **4**, 12407-12414.
- 5 Y. Wang, S. Zhao, Y. Zhu, R. Qiu, T. Gengenbach, Y. Liu, L. Zu, H. Mao, H. Wang, J. Tang, D. Zhao and C. Selomulya, *iScience*, 2020, **23**, 100761.
- 6 J. Wang, J. Huang, S. Zhao, I. P. Parkin, Z. Tian, F. Lai, T. Liu and G. He, *Green Energy Environ*, 2022, **02**, 014.
- 7 X. Y. Zhang, B. Y. Guo, X. Y. Chen, L. Zhao, B. Dong, M. Yang, J. F. Yu, L. Wang, C. G. Liu and Y. M. Chai, *Mater. Today Energy*, 2020, **17**, 100468.
- 8 B. Yuan, F. Sun, C. Li, W. Huang and Y. Lin, *Electrochim. Acta*, 2019, **313**, 91-98.
- 9 Z. Wang, S. Jiao, B. Wang, Y. Kang, W. Yin, X. Lv, Q. Zhang, Z. Zhang, Y. Chen and G. Pang, *Int. J. Hydrog. Energy*, 2021, **46**, 8345-8355.
- 10 B. Yuan, C. Li, L. Guan, K. Li and Y. Lin, *J. Power Sources*, 2020, **451**, 227295.
- 11 A. Muthurasu, G. P. Ojha, M. Lee and H. Y. Kim, *J. Phys. Chem. C*, 2020, **124**, 14465-14476.
- 12 R. Yue, Z. Mo, C. Shuai, S. He, W. Liu, G. Liu, Y. Du, Q. Dong, J. Ding, X. Zhu, N. Liu and R. Guo, *J. Electroanal. Chem*, 2022, **918**, 116427.
- 13 D. Chen, Z. Pu, R. Lu, P. Ji, P. Wang, J. Zhu, C. Lin, H. W. Li, X. Zhou, Z. Hu, F. Xia, J. Wu and S. Mu, *Adv. Energy Mater*, 2020, **10**, 2000814.
- 14 C. Zhang, J. Chen, J. Zhang, Y. Luo, Y. Chen, Y. Xue, Y. Yan, Y. Jiao, G. Wang and R. Wang, *J Colloid Interface Sci*, 2022, **607**, 967-977.
- 15 X. Xing, Y. Song, W. Jiang and X. Zhang, *Sustain. Energy Fuels*, 2020, **4**, 3985-3991.
- 16 L. M. Cao, Y. W. Hu, S. F. Tang, A. Iljin, J. W. Wang, Z. M. Zhang and T. B. Lu, *Adv Sci*, 2018, **5**, 1800949.
- 17 Y. Shen, S. G. Guo, F. Du, X. B. Yuan, Y. Zhang, J. Hu, Q. Shen, W. Luo, A. Alsaedi, T. Hayat, G. Wen, G. L. Li, Y. Zhou and Z. Zou, *Nanoscale*, 2019, **11**, 11765-11773.
- 18 T. Wang, Q. Pang, B. Li, Y. Chen and J. Z. Zhang, *Appl. Phys. Lett*, 2021, **118**, 233903.
- 19 G. Yan, X. Zhang and L. Xiao, *J Mater Sci*, 2019, **54**, 7087-7095.
